# Supplementary material for: miR33a/miR33b* and miR122 as Possible Contributors to Hepatic Lipid Metabolism in Obese Women with Nonalcoholic Fatty Liver Disease
Source: PubMed Central journal article supplement (PMC5085653; doi:10.3390/ijms17101620), 2016-09-24
Supplement: ijms-17-01620-s001.pdf [file ijms-17-01620-s001.pdf]

## Supplementary Materials: miR33a/miR33b\* and miR122 as Possible Contributors to Hepatic Lipid Metabolism in Obese Women with Nonalcoholic Fatty Liver Disease

Teresa Auguet, Gemma Aragonès, Alba Berlanga, Esther Guiu-Jurado, Andreu Martí, Salomé Martínez, Fàtima Sabench, Mercé Hernández, Carmen Aguilar, Joan Josep Sirvent, Daniel del Castillo and Cristóbal Richart

**Table S1.** Correlation between circulating miR122 and miR33b\* expression and anthropometrical, biochemical, and liver histological variables in the population studied.

| Variables                | miR122   |                 | miR33b*  |                 |
|--------------------------|----------|-----------------|----------|-----------------|
|                          | <i>r</i> | <i>p</i> -Value | <i>r</i> | <i>p</i> -Value |
| Age (years)              | 0.220    | 0.020           | 0.249    | 0.008           |
| BMI (kg/m <sup>2</sup> ) | 0.101    | 0.292           | 0.459    | <0.001          |
| Glucose (mg/dL)          | 0.430    | <0.001          | 0.214    | 0.025           |
| Insulin (mUI/L)          | 0.150    | 0.138           | 0.111    | 0.274           |
| HDL-C (mg/dL)            | -0.305   | 0.001           | -0.276   | 0.004           |
| LDL-C (mg/dL)            | -0.129   | 0.195           | 0.031    | 0.752           |
| Triglycerides (mg/dL)    | 0.133    | 0.172           | 0.279    | 0.004           |
| AST (U/L)                | 0.367    | <0.001          | 0.203    | 0.046           |
| ALT (U/L)                | 0.351    | <0.001          | 0.131    | 0.179           |
| Steatosis                | 0.017    | 0.880           | -0.143   | 0.187           |
| Lobular inflammation     | 0.225    | 0.017           | 0.123    | 0.193           |
| Ballooning               | 0.200    | 0.035           | 0.113    | 0.232           |

ALT, alanine aminotransferase; AST, aspartate aminotransferase; BMI, body mass index; HDL-C, high-density lipoprotein cholesterol; LDL-C, low-density lipoprotein cholesterol. The strength of association between variables was calculated using Pearson's *r* correlation test. Bold numbers indicate statistically significant correlations (*p*-value < 0.05).

**Table S2.** Binary logistic regression analysis for hepatocellular ballooning.

| Variables  | <i>B</i> | <i>Exp (B)</i> | 95% <i>CI</i> | <i>p</i> -Value |
|------------|----------|----------------|---------------|-----------------|
| Log miR122 | 0.784    | 2.19           | 1.20–3.99     | 0.010           |
| ALT        | 0.032    | 1.03           | 1.01–1.06     | 0.008           |

Backward regression analysis of 112 patients. Nagelkerke  $R^2 = 0.373$ ;  $p < 0.001$ . Variables entered in the model: Log miR122, age, BMI, HDL-C, triglycerides, AST, and ALT.
